# Supplementary material for: Rhodamine-labelled simple architectures for fluorometric and colorimetric sensing of Hg2+ and Pb2+ ions in semi-aqueous and aqueous environments
Source: Royal Society of Chemistry journal article supplement (doi:10.1039/c4ay00217b), 2014-01-01
Supplement: c4ay00217b1.pdf [file c4ay00217b1.pdf]

## Supporting Information

### Rhodamine-labelled simple architectures for fluorometric and colorimetric sensing of Hg<sup>2+</sup> and Pb<sup>2+</sup> ions in semi-aqueous and aqueous environments

Kumaresh Ghosh<sup>\*a</sup>, Tanmay Sarkar<sup>a</sup>, Anupam Majumdar<sup>a</sup>, Sushil Kumar Mondal<sup>b</sup>,  
Anisur Rahman Khuda-Bukhsh<sup>b</sup>

<sup>a</sup>Department of Chemistry, University of Kalyani, <sup>b</sup>Department of Zoology, University of Kalyani,  
Kalyani-741235, India.

Email: ghosh\_k2003@yahoo.co.in, Fax: +913325828282; Tel: +913325828750.

### 1. Spectral data of compounds

<sup>1</sup>H NMR of **3** (CDCl<sub>3</sub>, 400 MHz):

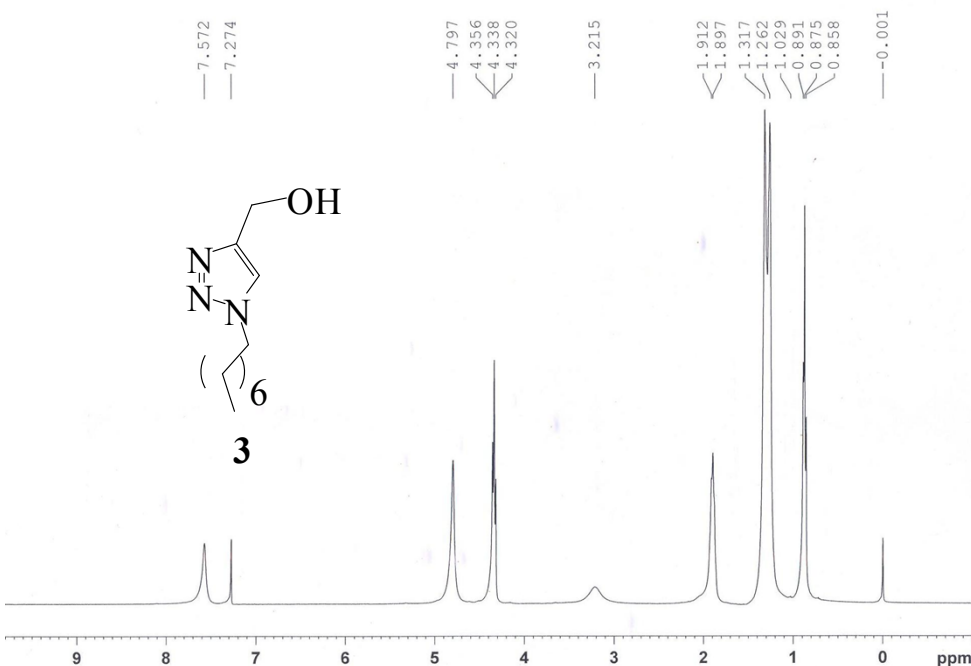

**$^1\text{H}$  NMR of 1 ( $\text{CDCl}_3$ , 400 MHz):**

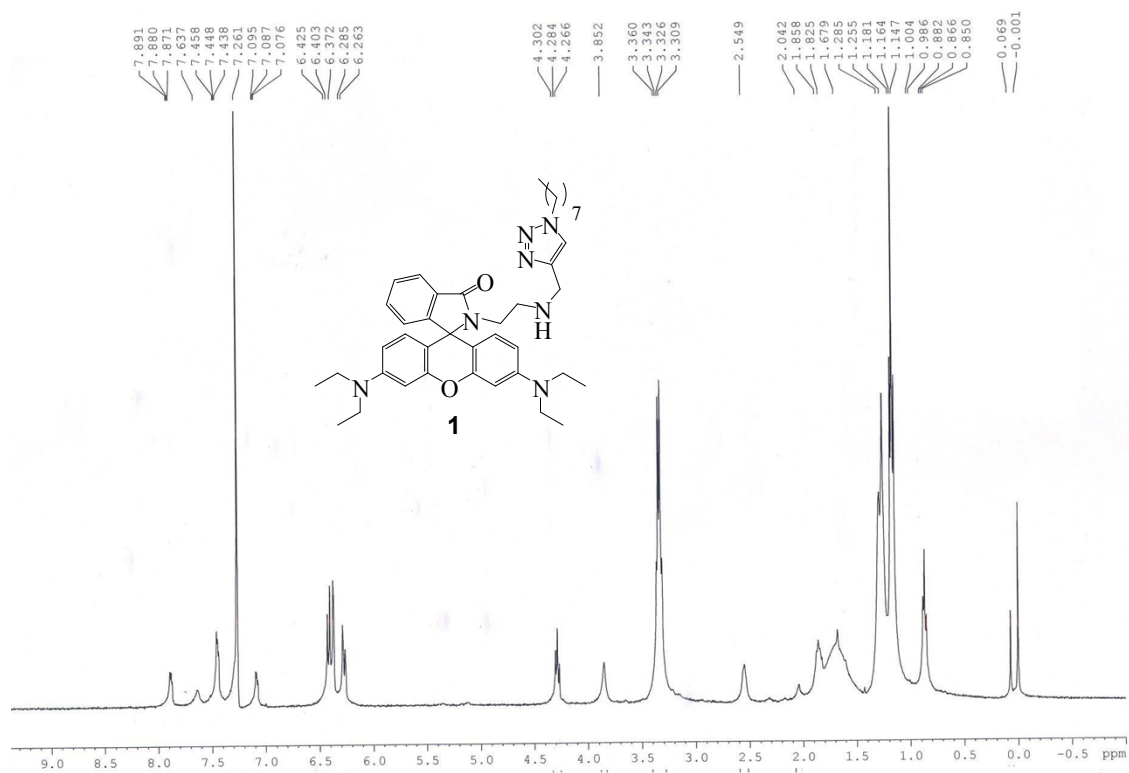

**$^{13}\text{C}$  NMR of 1 ( $\text{CDCl}_3$ , 100 MHz):**

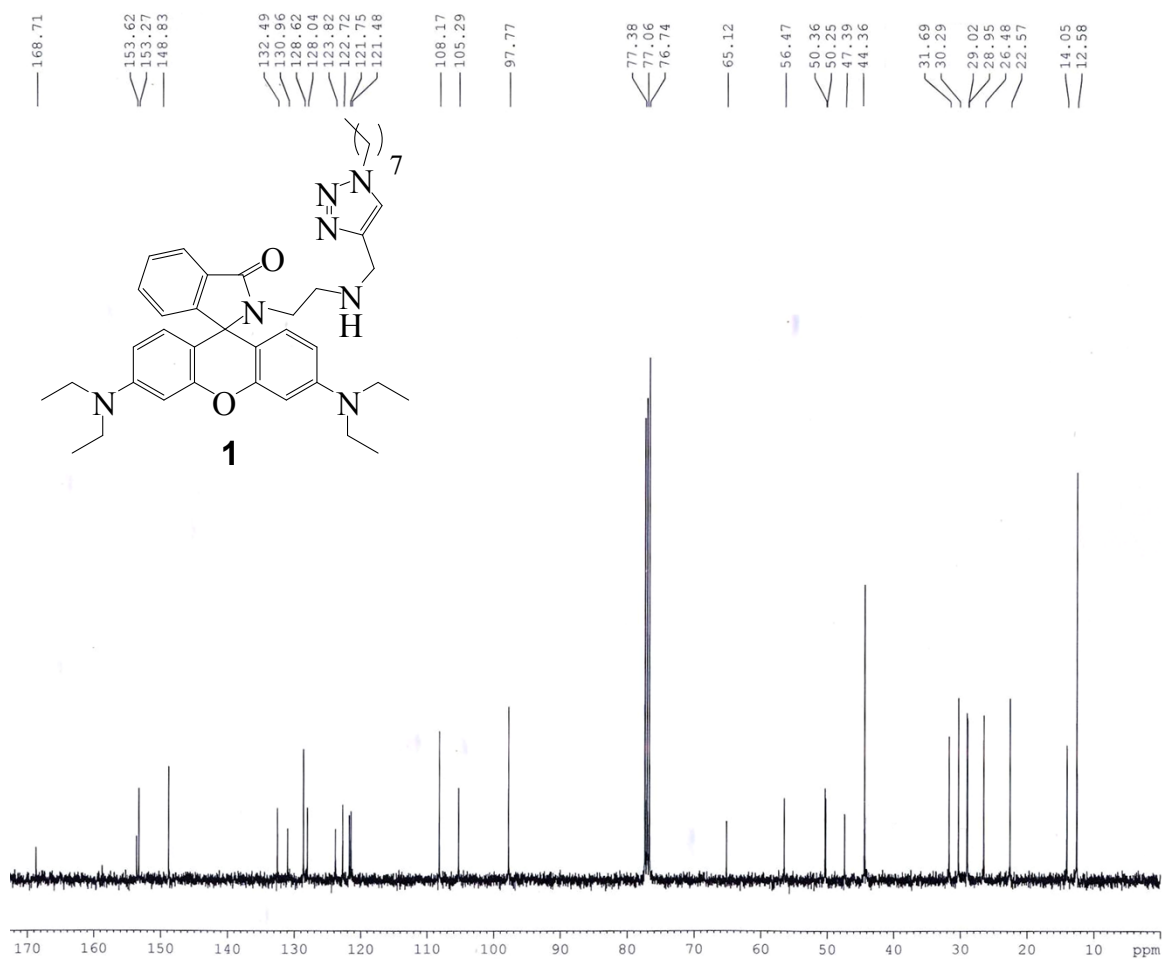

Mass of 1:

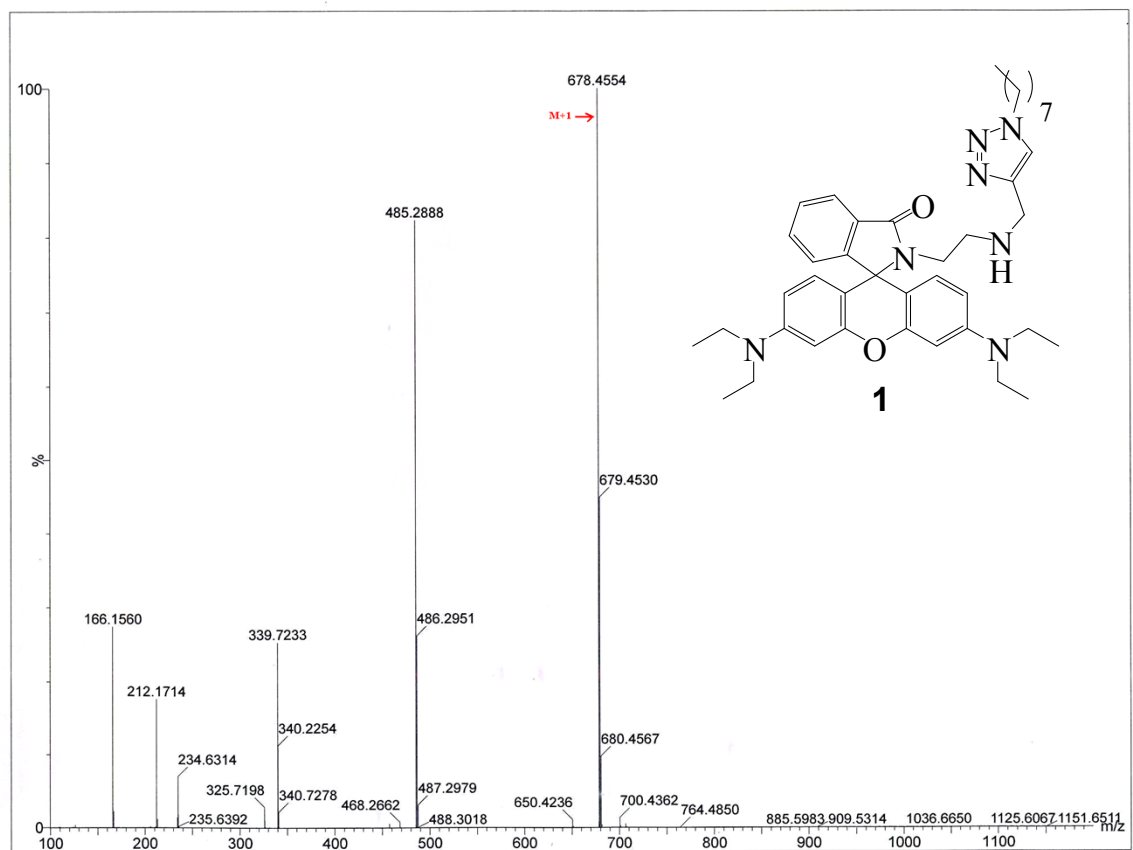

**2. Change in emission of receptor 1 with Zn<sup>2+</sup>, Fe<sup>3+</sup>, Cd<sup>2+</sup>, Co<sup>2+</sup>, Pb<sup>2+</sup>, Mg<sup>2+</sup>, Ni<sup>2+</sup>, Ag<sup>+</sup> in MeCN/Water (4/1, v/v; 10 μM tris HCl buffer; pH 7).**

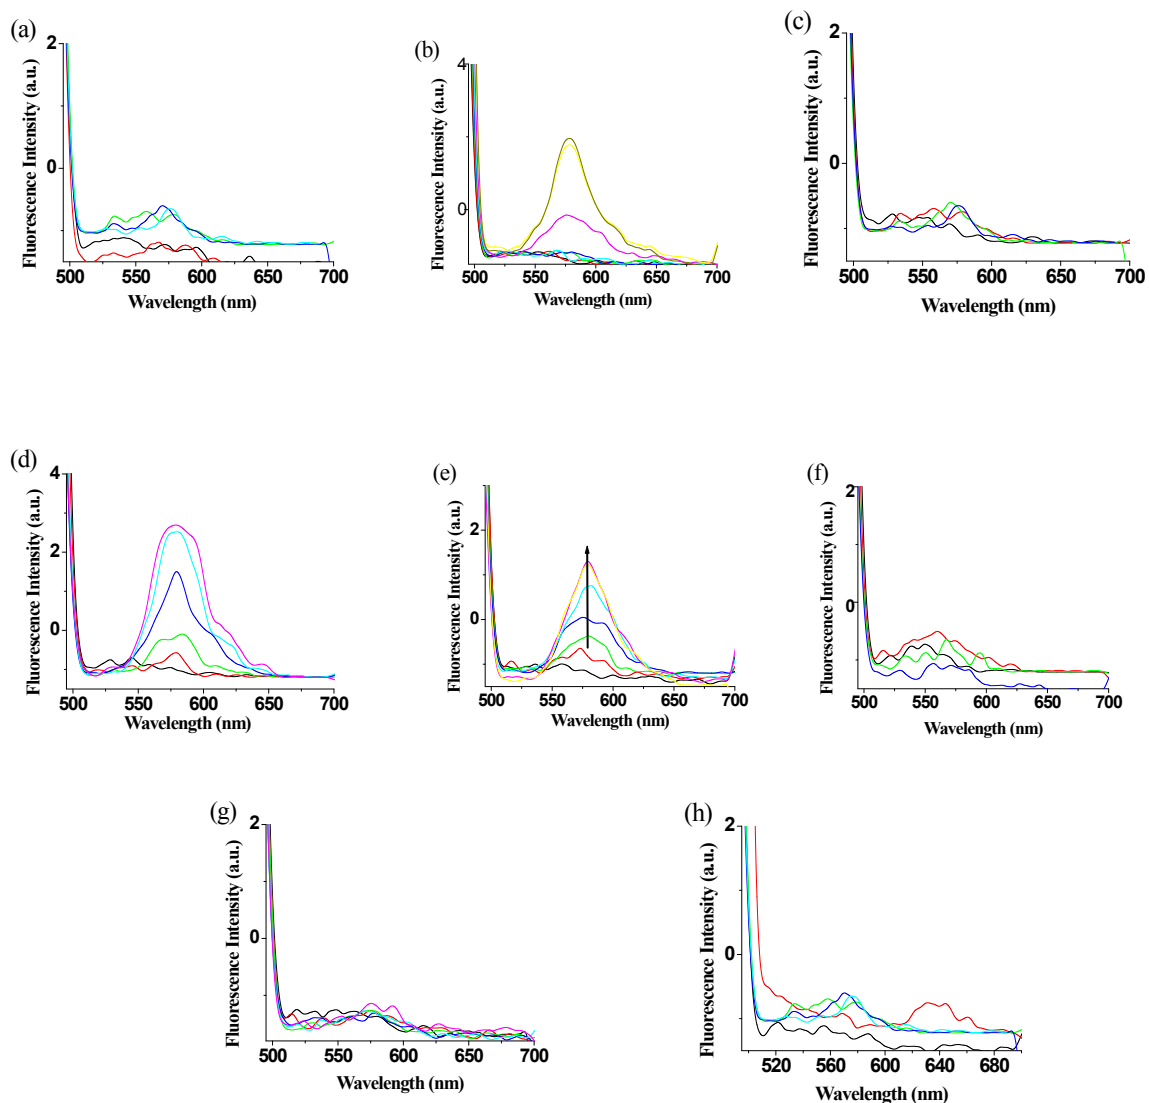

**Figure S1.** Change in emission of receptor 1 ( $c = 2.25 \times 10^{-5}$  M) upon addition of (a) Zn<sup>2+</sup>, (b) Fe<sup>3+</sup>, (c) Cd<sup>2+</sup>, (d) Co<sup>2+</sup>, (e) Cu<sup>2+</sup>, (f) Mg<sup>2+</sup>, (g) Ni<sup>2+</sup>, (h) Ag<sup>+</sup> in MeCN/Water (4/1, v/v; 10 μM tris HCl buffer; pH = 7) (in all cases [cation]  $4.5 \times 10^{-4}$  M) [ $\lambda_{\text{exc}} = 490$  nm].

**3. Change in absorbance of receptor 1 with various metal ions in MeCN/water (4/1, v/v; 10  $\mu$ M tris HCl buffer; pH = 7)**

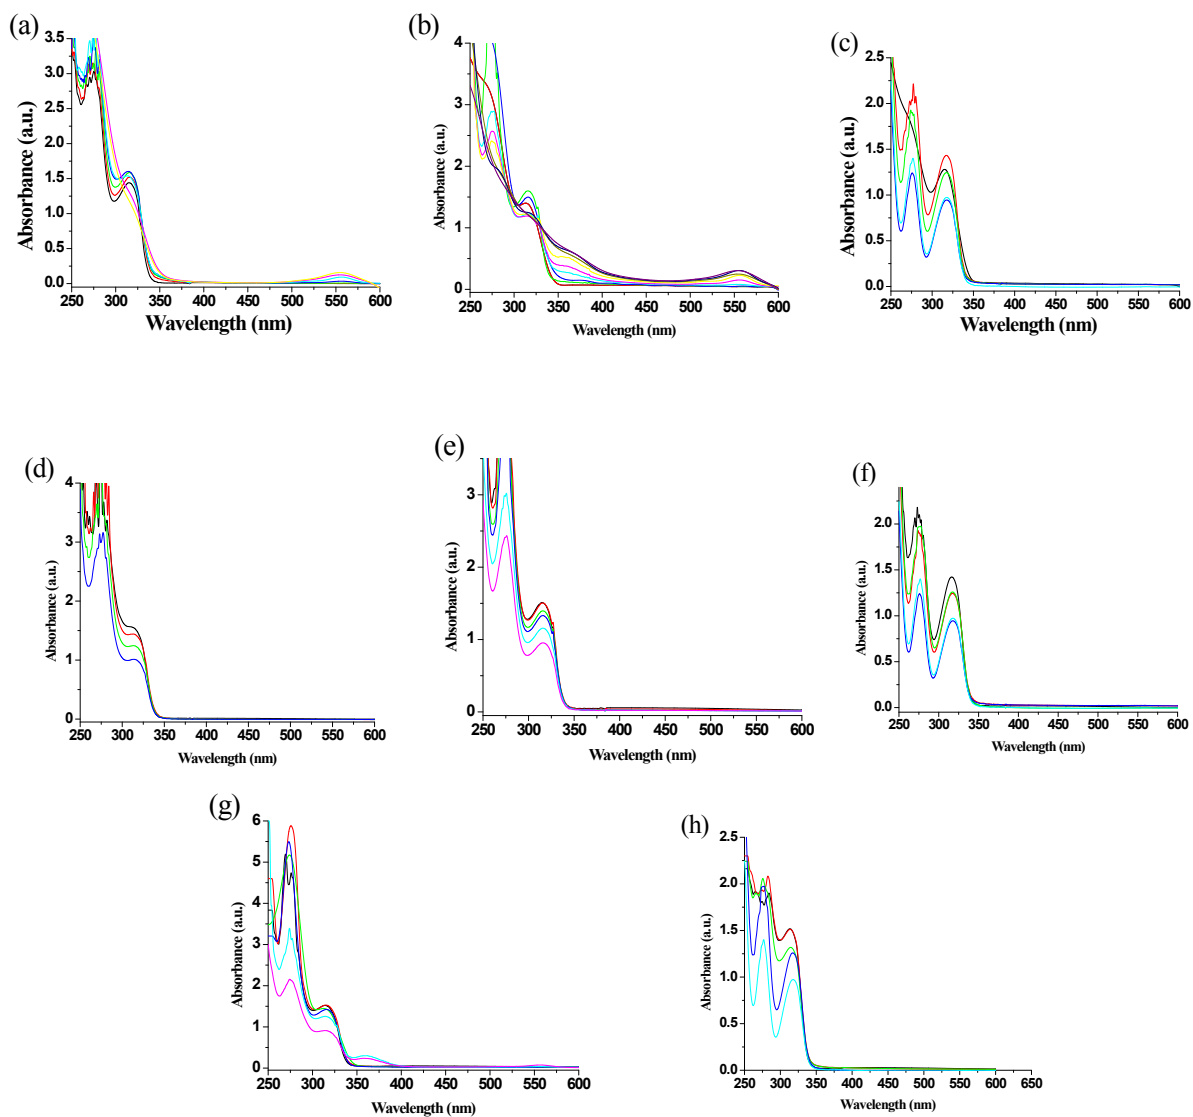

**Figure S2.** Absorption titration spectra for **1** ( $c = 2.25 \times 10^{-5}$  M) with (a)  $\text{Cu}^{2+}$ , (b)  $\text{Fe}^{3+}$ , (c)  $\text{Zn}^{2+}$ , (d)  $\text{Cd}^{2+}$ , (e)  $\text{Mg}^{2+}$ , (f)  $\text{Ni}^{2+}$ , (g)  $\text{Co}^{2+}$  and (h)  $\text{Ag}^{+}$  in MeCN/water (4/1, v/v; 10  $\mu$ M tris HCl buffer; pH = 7) (in all cases  $[\text{cation}] = 4.5 \times 10^{-4}$  M).

4.  $^1\text{H}$  NMR study, UV and Fluorescence Job plots for **1** with  $\text{Hg}^{2+}$  and  $\text{Pb}^{2+}$  measured at 556 nm.

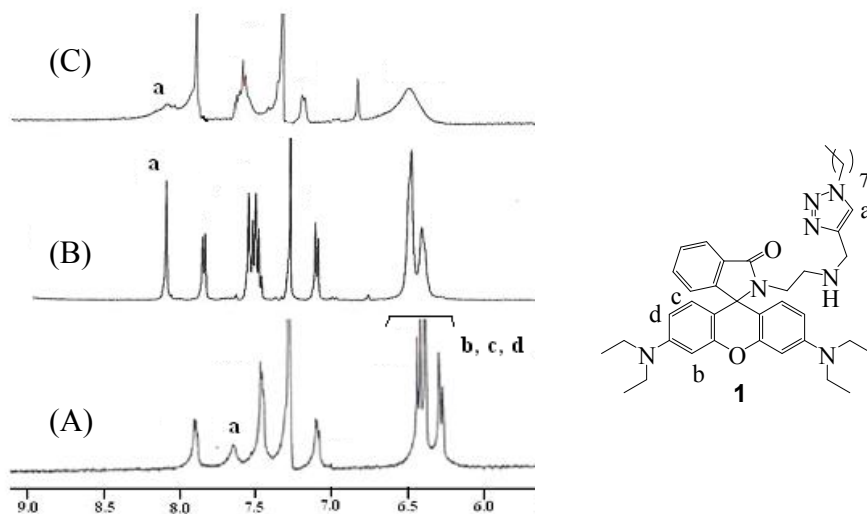

**Figure S3a.** Partial  $^1\text{H}$  NMR (400 MHz,  $\text{CDCl}_3$ ) of (A) **1** ( $5.21 \times 10^{-3}$  M); (B) with 1 equiv. amount of  $\text{Pb}(\text{ClO}_4)_2$  and (c) with 1 equiv.  $\text{Hg}(\text{ClO}_4)_2$ .

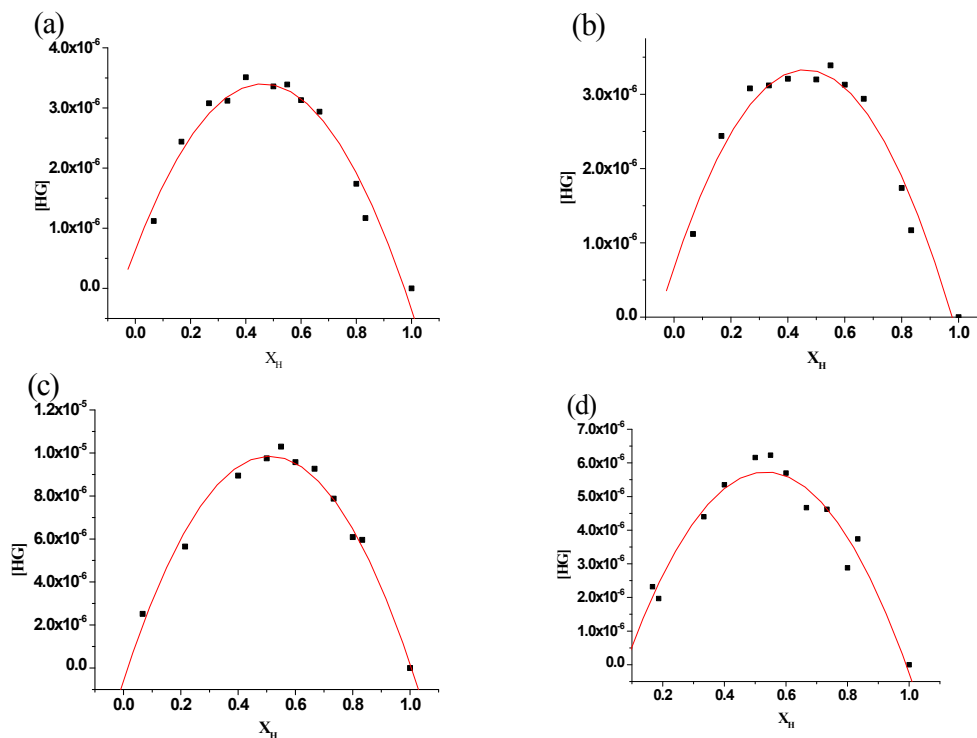

**Figure S3b.** Fluorescence Job plots for **1** with (a)  $\text{Hg}^{2+}$ ; (b)  $\text{Pb}^{2+}$ ; UV Job plots for **1** with (c)  $\text{Hg}^{2+}$ , (d)  $\text{Pb}^{2+}$  in MeCN/Water (4/1, v/v; 10  $\mu\text{M}$  tris HCl buffer; pH = 7) ( $[\text{H}] = [\text{G}] = 4.5 \times 10^{-5}$  M).

**5. Change in fluorescence spectra of (a) 1-  $\text{Hg}^{2+}$ , (b) 1-  $\text{Pb}^{2+}$  complex upon addition of KI**

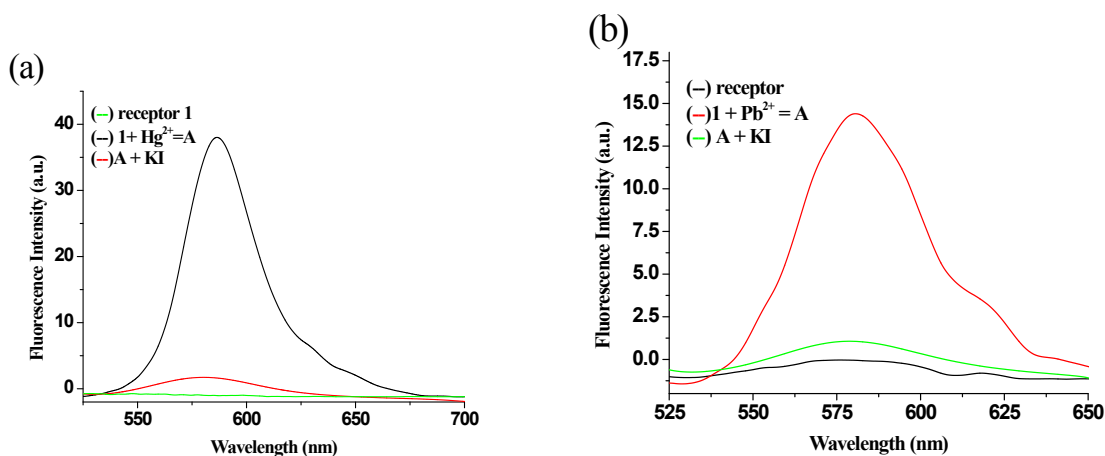

**Figure S4:** (a) Change in fluorescence spectra of (a)1-  $\text{Hg}^{2+}$ , (b) 1-  $\text{Pb}^{2+}$  complex ( $c = 4.1 \times 10^{-5}$  M) in MeCN/Water (4/1, v/v) 10  $\mu\text{M}$  tris HCl buffer (pH 7) upon addition of (a) KI ( $c = 2.1 \times 10^{-3}$  M).

**6. Colorimetric change of 1 with  $\text{Pb}^{2+}$ :**

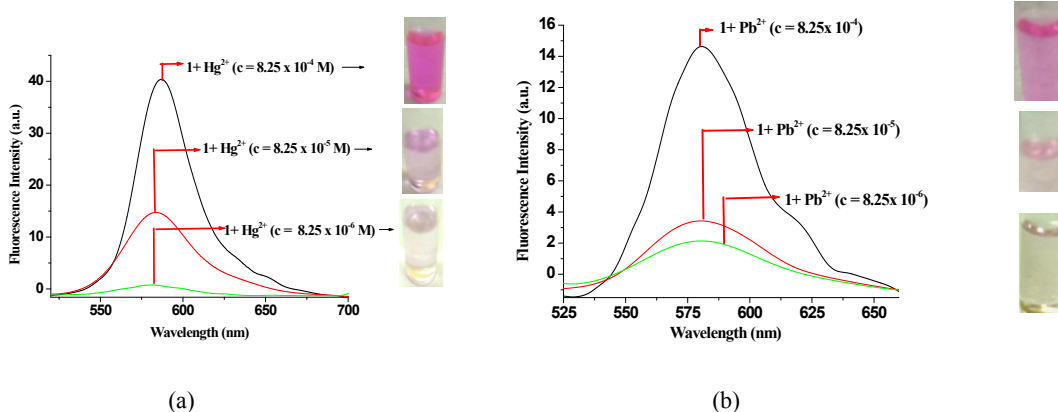

**Figure S5:** Change in fluorescence spectra of 1 ( $c = 2.25 \times 10^{-5}$  M) in  $\text{CH}_3\text{CN}/\text{water}$  (4/1, v/v; 10  $\mu\text{M}$  tris HCl buffer, pH = 7.0) upon addition of (a)  $\text{Hg}^{2+}$  and (b)  $\text{Pb}^{2+}$  of different concentrations.



## 7. MTT assay.

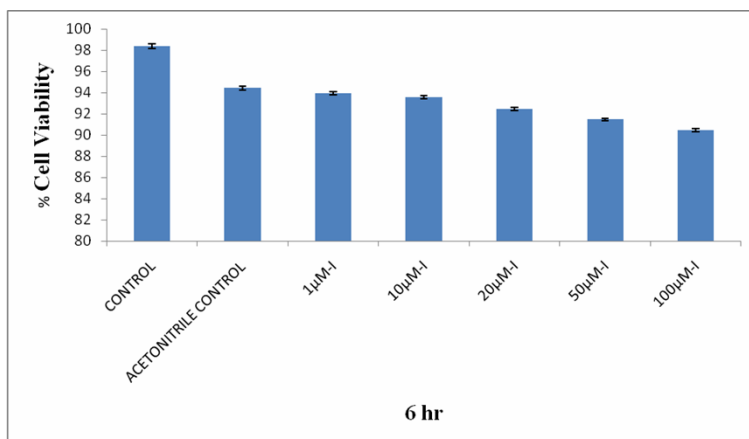

**Figure S6.** Cell viability of HeLa cells treated with different concentrations (1  $\mu$ M-100  $\mu$ M) of chemosensor **1** for six hrs determined by MTT assay.

## 8. FTIR spectra of **1**, Merrifield resin and **2**:

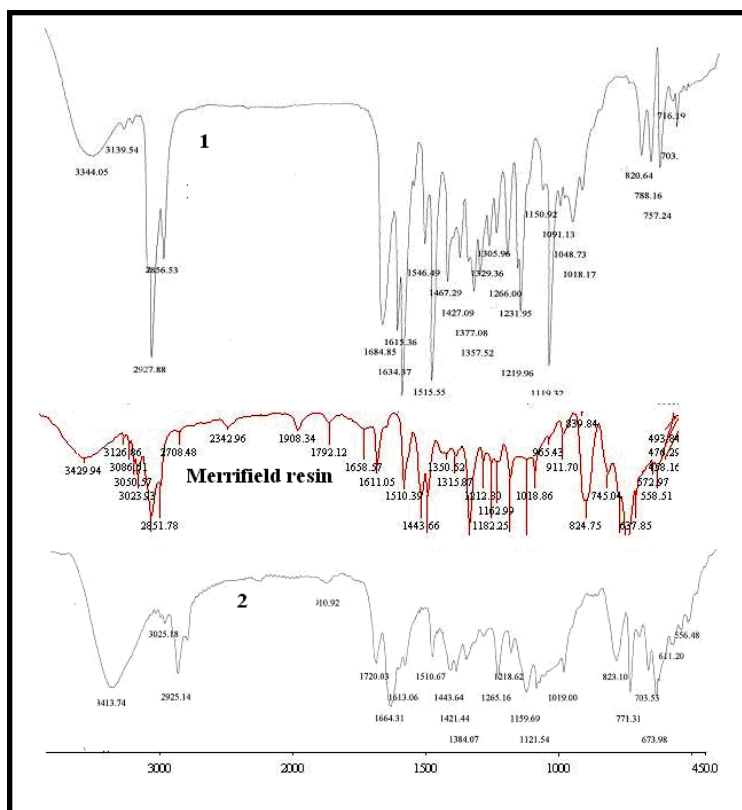

**Figure S7.** FTIR spectra of **1**, Merrifield resin and **2**.

## 9. FTIR spectra of 2, 2- $\text{Hg}^{2+}$ and 2- $\text{Pb}^{2+}$ complex:

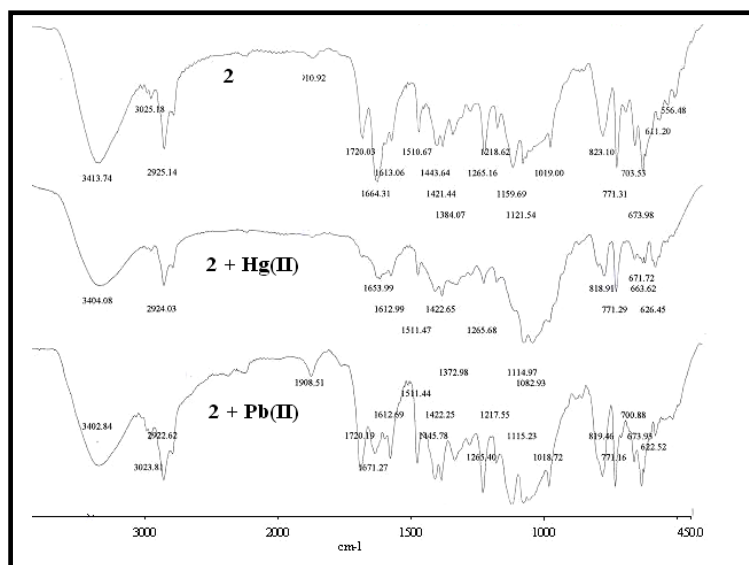

Figure S8. FTIR spectra of **2** and 2-  $\text{Hg}^{2+}$ , 2-  $\text{Pb}^{2+}$  complexes.

## 10. Reuse study:

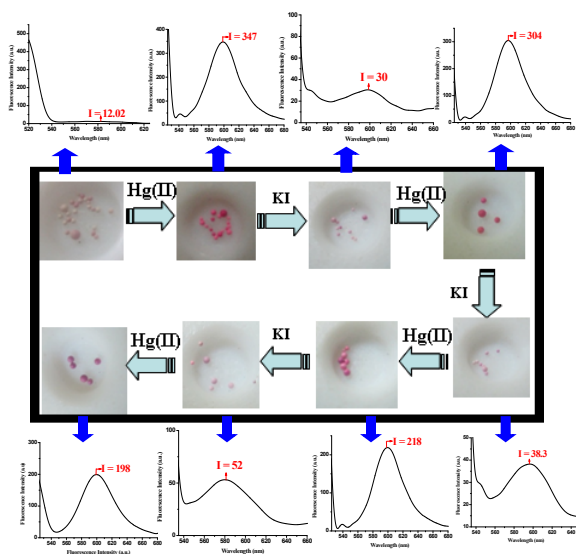

Figure S9. Reuse study of **2** for  $\text{Hg}^{2+}$  ions.
